# Supplementary material for: Transdifferentiation of Human Hair Follicle Mesenchymal Stem Cells into Red Blood Cells by OCT4
Source: Hindawi journal article supplement (doi:10.1155/2015/389628), 2015-01-01
Supplement: f1 [file 389628.f1.pdf]

## 1 **Supplemental materials**

### 2 **Figure S1. OCT4 transduced hHFMSCs give rise to subsets of hematopoietic-like** 3 **cells.**

4 (A) Emergence of round and floating cells among hHFMSCs<sup>OCT4</sup>(a, b); phase-contrast  
5 image of clones forming after re-attachment of floating cells (c, d). (B) Expression of  
6 HSC marked genes CD45, CD34 and CD133 were detected after OCT4 transduction by  
7 flow cytometer analysis. hHFMSC<sup>OCT4</sup> cells were treated with TrypLE and analyzed for  
8 expression of haematopoietic progenitor markers by staining single cells with  
9 fluorochrome-conjugated monoclonal antibody PE-anti-CD45 (1:100, BD Pharmingen),  
10 for CD34 (1:100) and CD133 antibody (1:50) staining, Alexa Fluor-555 goat anti-mouse  
11 and anti-rabbit IgG (1:200, CST) were used as the secondary antibody.

12 **Figure S2. hHFMSC-derived erythroblasts kept healthy development by adding**  
13 **nutritional factors** (a, f : original magnification ×400; b, c, d, e: original magnification  
14 ×200).

1 **Figure S1**

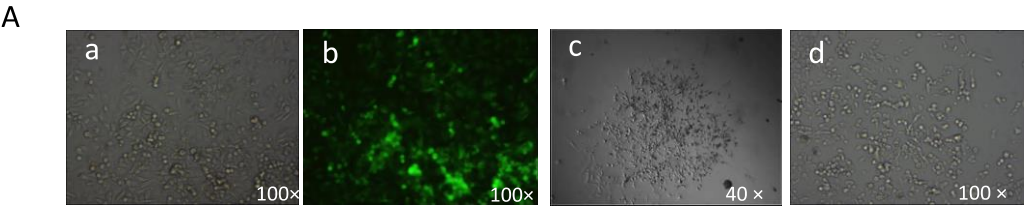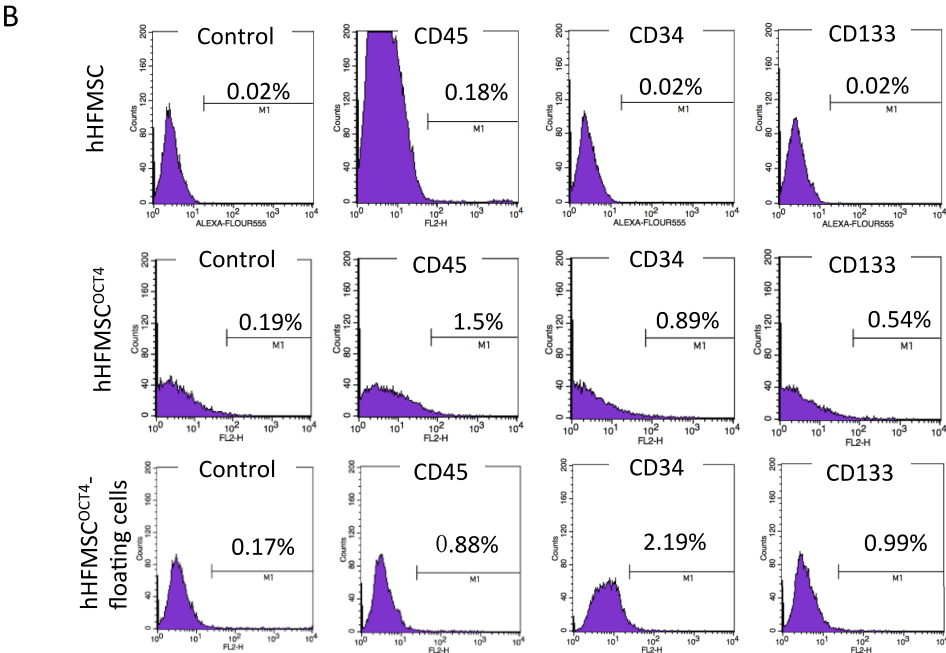

1 **Figure S2**

Adding\$  
nutritional\$  
factors

No\$  
adding\$  
nutritional\$  
factors

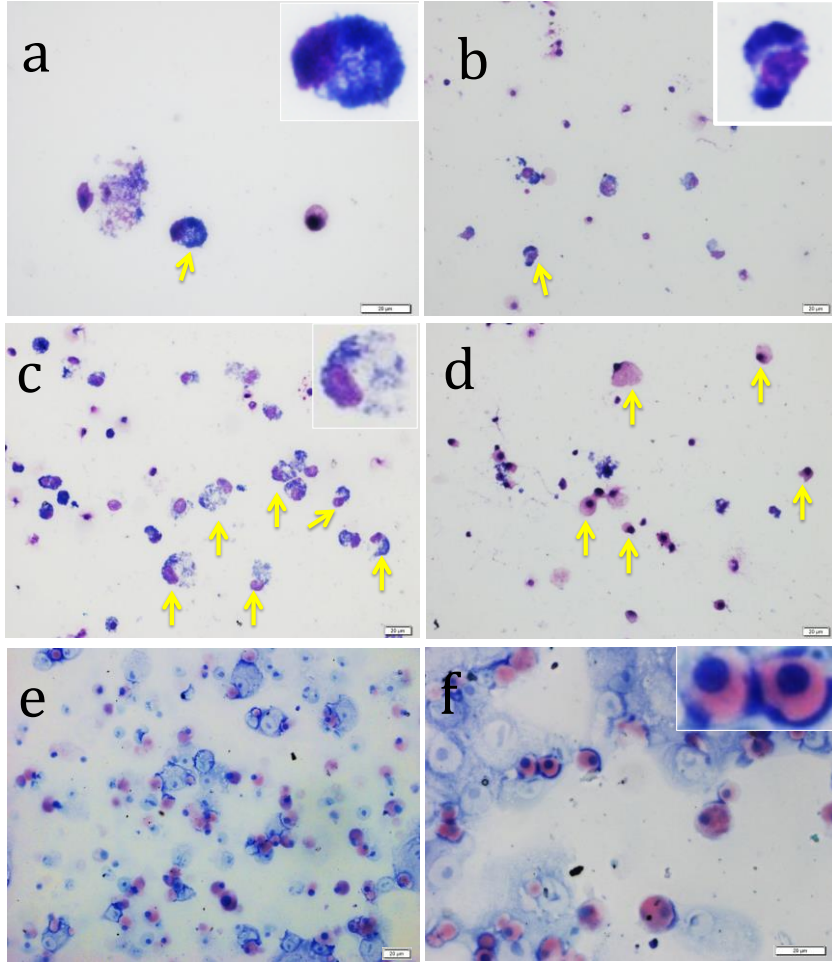

2

3
